# Supplementary material
Source: PubMed Central journal article supplement (PMC8823933)
Supplement: CJN.01730221SupplementaryData.pdf [file CJN.01730221SupplementaryData.pdf]

## **Supplemental Material**

Supplemental Table 1: Adjusted Cox proportional mortality hazards models among US veterans with an AKI hospitalization, 2009 to 2017. Death is censored at hospital discharge (in-hospital) and one-year.

Supplemental Table 2: Unadjusted and adjusted Cox proportional mortality hazard models among patients with and without AKI hospitalization, 2009 to 2017. Mortality is censored as hospital discharge (in-hospital) *and one-year*. Year is included as a categorical variable.

Supplemental Table 1: Adjusted Cox proportional mortality hazards models among US veterans with an AKI hospitalization, 2009 to 2017. Death is censored at hospital discharge (in-hospital) and one-year.

|                                | In-Hospital |          |                      | One-Year  |          |                      |
|--------------------------------|-------------|----------|----------------------|-----------|----------|----------------------|
|                                | N at Risk   | N Deaths | HR (95% CI)          | N at Risk | N Deaths | HR (95% CI)          |
| Year                           | 548782      | 31973    | 0.994 (0.992, 0.996) | 548782    | 147014   | 0.995 (0.993, 0.997) |
| Female                         | 17174       | 745      | 0.63 (0.61, 0.66)    | 17174     | 3020     | 0.64 (0.61, 0.66)    |
| Age (ref. is 22-49)            |             |          |                      |           |          |                      |
| 50-59                          | 221534      | 3377     | 1.75 (1.67, 1.84)    | 221534    | 13521    | 1.75 (1.66, 1.84)    |
| 60-69                          | 606161      | 10335    | 1.46 (1.40, 1.54)    | 606161    | 44963    | 1.47 (1.40, 1.54)    |
| 70+                            | 1182306     | 17626    | 1.44 (1.37, 1.51)    | 1182306   | 86242    | 1.44 (1.38, 1.51)    |
| Race (ref group is white)      |             |          |                      |           |          |                      |
| Black                          | 385185      | 5895     | 0.81 (0.79, 0.82)    | 385185    | 27768    | 0.80 (0.79, 0.82)    |
| Other                          | 254448      | 5463     | 1.20 (1.18, 1.22)    | 254448    | 21378    | 1.20 (1.18, 1.22)    |
| Hypertension                   | 952322      | 13490    | 0.81 (0.80, 0.83)    | 952322    | 70242    | 0.82 (0.81, 0.83)    |
| Diabetes and CKD (ref is none) |             |          |                      |           |          |                      |
| Diabetes only                  | 110957      | 4963     | 0.84 (0.82, 0.85)    | 110957    | 23839    | 0.84 (0.83, 0.86)    |
| CKD only                       | 88736       | 5391     | 1.24 (1.22, 1.26)    | 88736     | 28900    | 1.25 (1.23, 1.27)    |
| Both Diabetes & CKD            | 84929       | 3427     | 1.05 (1.04, 1.07)    | 84929     | 23233    | 1.06 (1.04, 1.08)    |
| Myocardial Infarction          | 19268       | 1508     | 1.20 (1.16, 1.24)    | 19268     | 6260     | 1.19 (1.16, 1.23)    |
| Peripheral Vascular Disease    | 49402       | 3171     | 1.17 (1.15, 1.20)    | 49402     | 15273    | 1.17 (1.15, 1.20)    |
| Cancer                         | 11838       | 1583     | 3.44 (3.35, 3.54)    | 11838     | 7794     | 3.44 (3.34, 3.53)    |
| Liver Disease                  | 22606       | 2329     | 1.99 (1.94, 2.04)    | 22606     | 9839     | 1.99 (1.94, 2.04)    |
| COPD                           | 101899      | 6979     | 1.31 (1.29, 1.33)    | 101899    | 32849    | 1.31 (1.29, 1.33)    |
| CVA or TIA                     | 46445       | 3171     | 1.24 (1.21, 1.26)    | 46445     | 14493    | 1.23 (1.21, 1.26)    |
| AKI Stage (ref=Stage 1)        |             |          |                      |           |          |                      |
| AKI Stage 2                    | 18375       | 2381     | 1.24 (1.20, 1.28)    | 18375     | 6014     | 1.23 (1.19, 1.27)    |
| AKI Stage 3 without dialysis   | 55450       | 6661     | 1.44 (1.41, 1.46)    | 55450     | 19706    | 1.43 (1.40, 1.45)    |
| AKI with dialysis              | 23530       | 3759     | 1.32 (1.29, 1.36)    | 23530     | 9474     | 1.29 (1.26, 1.33)    |
| Surgical DRG                   | 207396      | 10150    | 0.96 (0.95, 0.97)    | 207396    | 53702    | 0.96 (0.94, 0.97)    |
| ICU                            | 122307      | 12217    | 0.95 (0.93, 0.96)    | 122307    | 36524    | 0.95 (0.94, 0.96)    |
| Mechanical Ventilation         | 42095       | 14632    | 2.47 (2.42, 2.52)    | 42095     | 22748    | 2.41 (2.36, 2.46)    |
| Sepsis                         | 50858       | 12072    | 1.68 (1.65, 1.71)    | 50858     | 23345    | 1.66 (1.63, 1.69)    |
| Vasopressors Used During Stay  | 54685       | 4765     | 1.04 (1.02, 1.06)    | 54685     | 16547    | 1.02 (1.01, 1.04)    |
| Length of stay                 | ---         | ---      | ---                  | 548782    | 147014   | 0.995 (0.993, 0.997) |

Abbreviations: AKI, acute kidney injury; CKD, chronic kidney disease; ICU, intensive care unit; HR, hazard ratio; CI, confidence interval.

Supplemental Table 2: Unadjusted and adjusted Cox proportional mortality hazard models among patients with and without AKI hospitalization, 2009 to 2017. Mortality is censored as hospital discharge (in-hospital) *and one-year*. Year is included as a categorical variable.

|                    | Unadjusted        | Model 1 <sup>a</sup><br>Hazards Ratio (95% Confidence Interval) | Model 2 <sup>b</sup> | Model 3 <sup>c</sup> |
|--------------------|-------------------|-----------------------------------------------------------------|----------------------|----------------------|
| <b>In-Hospital</b> |                   |                                                                 |                      |                      |
| <u>AKI</u>         |                   |                                                                 |                      |                      |
| 2009               | ref               | ref                                                             | ref                  | Ref                  |
| 2010               | 0.97 (0.91, 1.03) | 0.97 (0.91, 1.03)                                               | 0.96 (0.90, 1.02)    | 0.95 (0.90, 1.01)    |
| 2011               | 0.97 (0.92, 1.03) | 0.97 (0.91, 1.03)                                               | 0.97 (0.91, 1.03)    | 0.96 (0.90, 1.02)    |
| 2012               | 1.00 (0.94, 1.06) | 1.00 (0.95, 1.06)                                               | 0.99 (0.93, 1.05)    | 0.95 (0.89, 1.01)    |
| 2013               | 0.96 (0.91, 1.02) | 0.97 (0.91, 1.03)                                               | 0.95 (0.89, 1.01)    | 0.89 (0.84, 0.95)    |
| 2014               | 0.92 (0.87, 0.98) | 0.92 (0.87, 0.98)                                               | 0.90 (0.85, 0.96)    | 0.85 (0.80, 0.91)    |
| 2015               | 0.94 (0.88, 0.99) | 0.94 (0.88, 1.00)                                               | 0.92 (0.87, 0.98)    | 0.88 (0.83, 0.94)    |
| 2016               | 0.90 (0.85, 0.96) | 0.91 (0.86, 0.97)                                               | 0.87 (0.82, 0.93)    | 0.89 (0.83, 0.95)    |
| 2017               | 0.89 (0.83, 0.94) | 0.89 (0.84, 0.95)                                               | 0.85 (0.80, 0.91)    | 0.89 (0.83, 0.95)    |
| <u>Non-AKI</u>     |                   |                                                                 |                      |                      |
| 2009               | ref               | ref                                                             | ref                  | ref                  |
| 2010               | 1.07 (0.99, 1.15) | 1.07 (0.99, 1.15)                                               | 1.05 (0.97, 1.13)    | 1.01 (0.93, 1.09)    |
| 2011               | 1.09 (1.01, 1.17) | 1.08 (1.00, 1.17)                                               | 1.07 (0.99, 1.15)    | 1.03 (0.95, 1.11)    |
| 2012               | 1.05 (0.97, 1.13) | 1.05 (0.98, 1.14)                                               | 1.03 (0.96, 1.12)    | 0.98 (0.90, 1.06)    |
| 2013               | 1.13 (1.05, 1.22) | 1.14 (1.06, 1.23)                                               | 1.09 (1.01, 1.18)    | 0.99 (0.92, 1.07)    |
| 2014               | 0.97 (0.90, 1.05) | 0.99 (0.91, 1.07)                                               | 0.94 (0.87, 1.02)    | 0.85 (0.78, 0.92)    |
| 2015               | 0.99 (0.91, 1.07) | 1.01 (0.90, 1.09)                                               | 0.94 (0.87, 1.02)    | 0.84 (0.77, 0.91)    |
| 2016               | 0.98 (0.91, 1.07) | 1.01 (0.93, 1.09)                                               | 0.96 (0.89, 1.04)    | 0.95 (0.87, 1.03)    |
| 2017               | 0.97 (0.90, 1.06) | 0.99 (0.92, 1.08)                                               | 0.94 (0.86, 1.02)    | 0.92 (0.85, 1.00)    |
| <b>One-Year</b>    |                   |                                                                 |                      |                      |
| <u>AKI</u>         |                   |                                                                 |                      |                      |
| 2009               | ref               | ref                                                             | ref                  | ref                  |
| 2010               | 0.98 (0.96, 1.01) | 0.98 (0.96, 1.01)                                               | 0.97 (0.94, 0.99)    | 0.95 (0.92, 0.97)    |
| 2011               | 0.96 (0.94, 0.98) | 0.96 (0.94, 0.99)                                               | 0.96 (0.94, 0.99)    | 0.95 (0.92, 0.97)    |
| 2012               | 0.96 (0.93, 0.98) | 0.96 (0.94, 0.99)                                               | 0.94 (0.92, 0.97)    | 0.92 (0.90, 0.95)    |
| 2013               | 0.96 (0.93, 0.98) | 0.96 (0.94, 0.99)                                               | 0.94 (0.91, 0.96)    | 0.92 (0.89, 0.94)    |
| 2014               | 0.95 (0.93, 0.98) | 0.96 (0.93, 0.98)                                               | 0.93 (0.90, 1.00)    | 0.90 (0.87, 0.92)    |
| 2015               | 0.96 (0.94, 0.99) | 0.97 (0.95, 1.00)                                               | 0.94 (0.92, 0.96)    | 0.92 (0.89, 0.94)    |
| 2016               | 0.94 (0.91, 0.96) | 0.95 (0.92, 0.97)                                               | 0.89 (0.87, 0.91)    | 0.89 (0.87, 0.91)    |
| 2017               | 0.95 (0.92, 0.97) | 0.96 (0.94, 0.99)                                               | 0.90 (0.88, 0.93)    | 0.90 (0.88, 0.93)    |
| <u>Non-AKI</u>     |                   |                                                                 |                      |                      |
| 2009               | ref               | ref                                                             | ref                  | ref                  |
| 2010               | 1.02 (1.01, 1.04) | 1.03 (1.01, 1.05)                                               | 1.02 (1.00, 1.04)    | 1.00 (0.99, 1.02)    |
| 2011               | 1.01 (1.00, 1.03) | 1.02 (1.01, 1.04)                                               | 1.01 (0.99, 1.02)    | 0.99 (0.97, 1.01)    |
| 2012               | 1.02 (1.00, 1.04) | 1.03 (1.02, 1.05)                                               | 1.00 (0.98, 1.02)    | 0.98 (0.97, 1.00)    |
| 2013               | 1.04 (1.02, 1.06) | 1.06 (1.04, 1.08)                                               | 1.02 (1.00, 1.03)    | 1.00 (0.98, 1.01)    |
| 2014               | 1.05 (1.03, 1.06) | 1.07 (1.05, 1.09)                                               | 1.01 (0.99, 1.03)    | 0.98 (0.96, 1.00)    |
| 2015               | 1.04 (1.02, 1.06) | 1.07 (1.05, 1.08)                                               | 0.99 (0.97, 1.01)    | 0.96 (0.95, 0.98)    |
| 2016               | 1.03 (1.01, 1.05) | 1.06 (1.04, 1.08)                                               | 0.98 (0.96, 0.99)    | 0.96 (0.94, 0.98)    |
| 2017               | 1.03 (1.01, 1.05) | 1.07 (1.05, 1.09)                                               | 0.98 (0.96, 0.99)    | 0.96 (0.95, 0.98)    |

<sup>a</sup>Model 1 includes patients demographics, including preadmission age, gender, and race (black or other).

<sup>b</sup>Model 2 contains model 1 + pre-hospital comorbid diseases, including hypertension, diabetes mellitus, chronic kidney disease, congestive heart failure, myocardial infarction, peripheral vascular disease, malignancy, liver disease, chronic obstructive pulmonary disease, and cerebrovascular disease.

<sup>c</sup>Model 3 contains model 2 + acute hospitalization characteristics, including AKI stage, mechanical ventilation, intensive care unit utilization, sepsis, vasopressor use, hospital length of stay and primary admitting service (surgical versus other).
